# Supplementary material for: Hexagonal perovskite Sr6(Co0.8Fe0.2)5O15 as an efficient electrocatalyst towards the oxygen evolution reaction
Source: Royal Society of Chemistry journal article supplement (doi:10.1039/d2dt00706a), 2022-01-01
Supplement: d2dt00706a1.pdf [file d2dt00706a1.pdf]

## Hexagonal perovskite $\text{Sr}_6(\text{Co}_{0.8}\text{Fe}_{0.2})_5\text{O}_{15}$ as an efficient electrocatalyst towards the oxygen evolution reaction

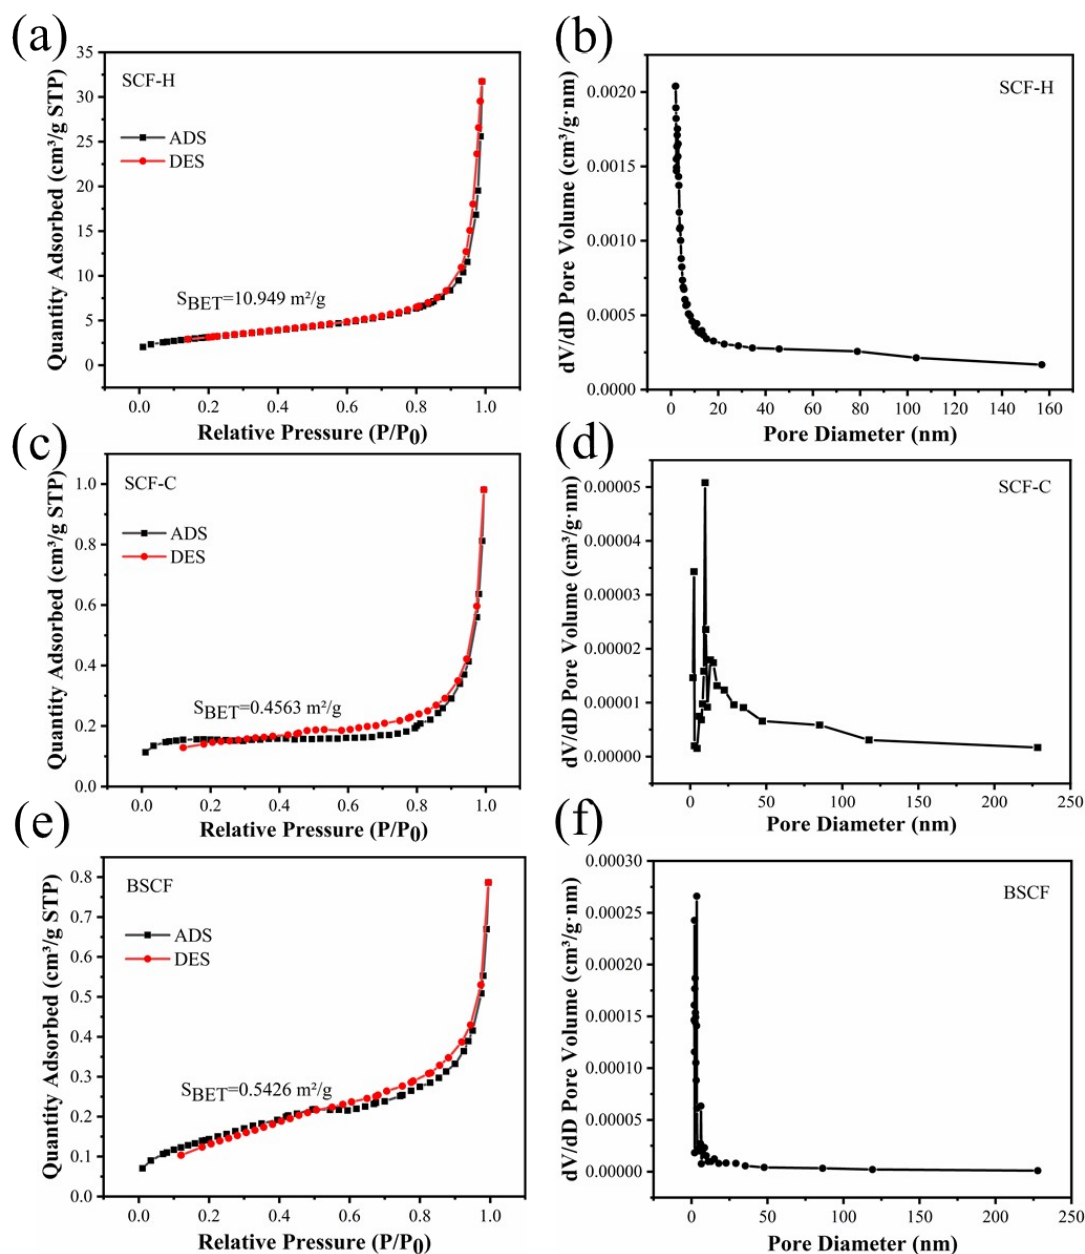

**Fig. S1.** The specific surface area and the pore size distribution (inside) of samples calculated based on the Brunner–Emmet–Teller (BET) method and Barrett–Joyner–Halenda (BJH) model respectively: a, b) SCF-H, c, d) SCF-C, e, f) BSCF.

Since the perovskite catalyst is usually sintered at a higher temperature, it often exhibits a low specific surface area, and the specific surface area often has a certain effect on the activity of the material. As shown in the Fig. S1, in order to obtain more microscopic information of SCF-H and SCF-C (typical BSCF added as a comparison), the specific surface area and pore structure of the catalyst are characterized by the N<sub>2</sub> adsorption-desorption isotherm. It can be clearly found that all samples show typical type II adsorption isotherms with hysteresis loops. The Brunner-Emmet-Teller (BET) method was used to calculate the specific surface area of the sample. The

specific surface areas of SCF-H, SCF-C and BSCF were 10.9490 m<sup>2</sup>/g, 0.4563 m<sup>2</sup>/g and 0.5426 m<sup>2</sup>/g, respectively. The BJH (Barrett-Joyner-Halenda) method was used to calculate the adsorption and desorption data to obtain the pore size distribution map. The results show that all the catalysts lacked pore structure characteristics, which is the same as the conclusion of the SEM image. Compared with SCF-C and BSCF, SCF-H exhibits a larger specific surface area, and may expose more electroactive sites, resulting in the enhancement of OER activity.

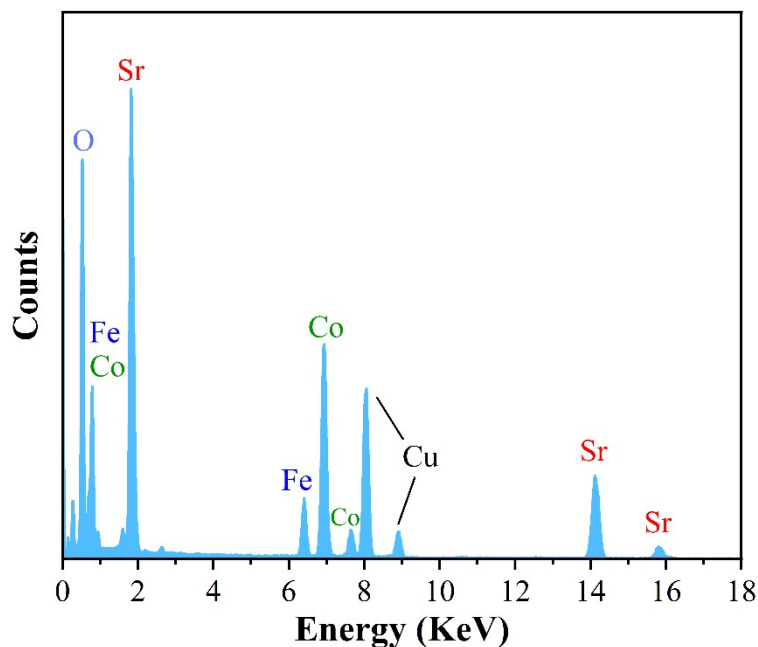

Fig. S2. EDS spectrum of SCF-H.

Table S1. Comparison of OER activity of SCF-H with reported outstanding pseudocubic perovskite-based catalysts in 1.0M KOH

| Electrocatalyst                                                                                                 | Over-potential | Tafel | Electrode | Ref.      |
|-----------------------------------------------------------------------------------------------------------------|----------------|-------|-----------|-----------|
| SCF-H                                                                                                           | 318            | 54    | GC        | This work |
| PrBaCo <sub>2</sub> O <sub>5.75</sub>                                                                           | 360            | 70    | GC        | 1         |
| La <sub>0.5</sub> Sr <sub>0.5</sub> Ni <sub>0.4</sub> Fe <sub>0.6</sub> O <sub>3-δ</sub>                        | 330            | 76    | GC        | 2         |
| CaLaScRuO <sub>6+δ</sub>                                                                                        | 478            | 84    | GC        | 3         |
| CoP-PrBa <sub>0.5</sub> Sr <sub>0.5</sub> Co <sub>1.5</sub> Fe <sub>0.5</sub> O <sub>5+δ</sub>                  | 340            | 82    | GC        | 4         |
| Sr <sub>0.95</sub> Nb <sub>0.1</sub> Co <sub>0.9-x</sub> Ni <sub>x</sub> O <sub>3-δ</sub>                       | 438            | 64    | GC        | 5         |
| NdBaMn <sub>2</sub> O <sub>5.5</sub>                                                                            | 430            | 75    | GC        | 6         |
| La <sub>0.8</sub> Sr <sub>0.2</sub> CoO <sub>3-δ</sub> -MWNT                                                    | 370            | -     | RRDE      | 7         |
| La <sub>0.8</sub> Sr <sub>0.2</sub> Ni <sub>0.2</sub> Co <sub>0.8</sub> O <sub>3-δ</sub> -MWNT                  | 350            | -     | RRDE      | 7         |
| La <sub>0.9</sub> Sr <sub>0.1</sub> Fe <sub>0.5</sub> Co <sub>0.5</sub> O <sub>3-δ</sub> -MWNT                  | 330            | -     | RRDE      | 7         |
| La <sub>0.72</sub> Sr <sub>0.28</sub> Mn <sub>0.92</sub> Co <sub>0.08</sub> O <sub>3-δ</sub> -MWNT              | 360            | -     | RRDE      | 7         |
| La <sub>0.2</sub> Sr <sub>0.8</sub> Cu <sub>0.4</sub> Co <sub>0.6</sub> O <sub>3-δ</sub> -MWNT                  | 350            | -     | RRDE      | 7         |
| La <sub>0.6</sub> Sr <sub>0.4</sub> Co <sub>0.8</sub> Fe <sub>0.2</sub> O <sub>3</sub> -700°C hollow nanofibers | 353            | 63    | GC        | 8         |

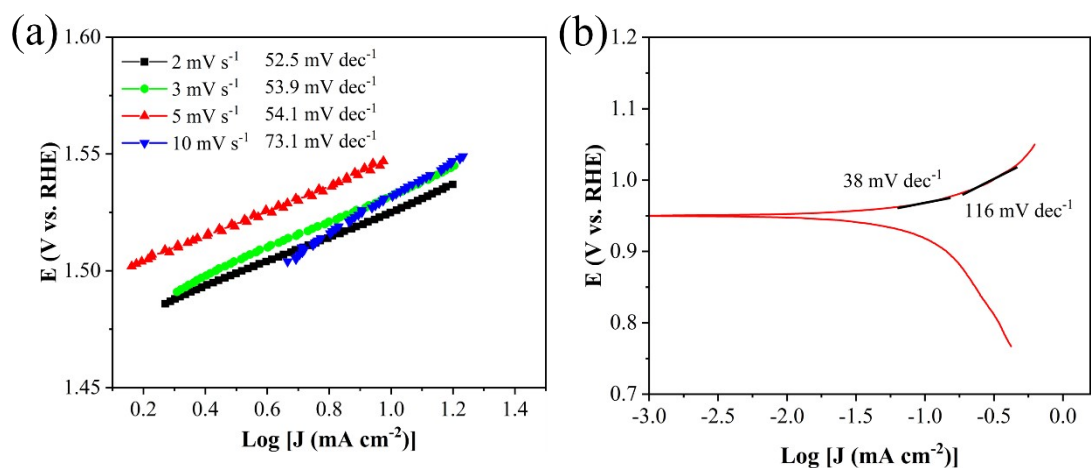

**Fig. S3.** a) Tafel plots and the corresponding fitted slopes for SCF-H at different scan rates. b) Tafel plot at continuous current density (from  $\sim 0.01$  to  $1 \text{ mA cm}^{-2}$ ).

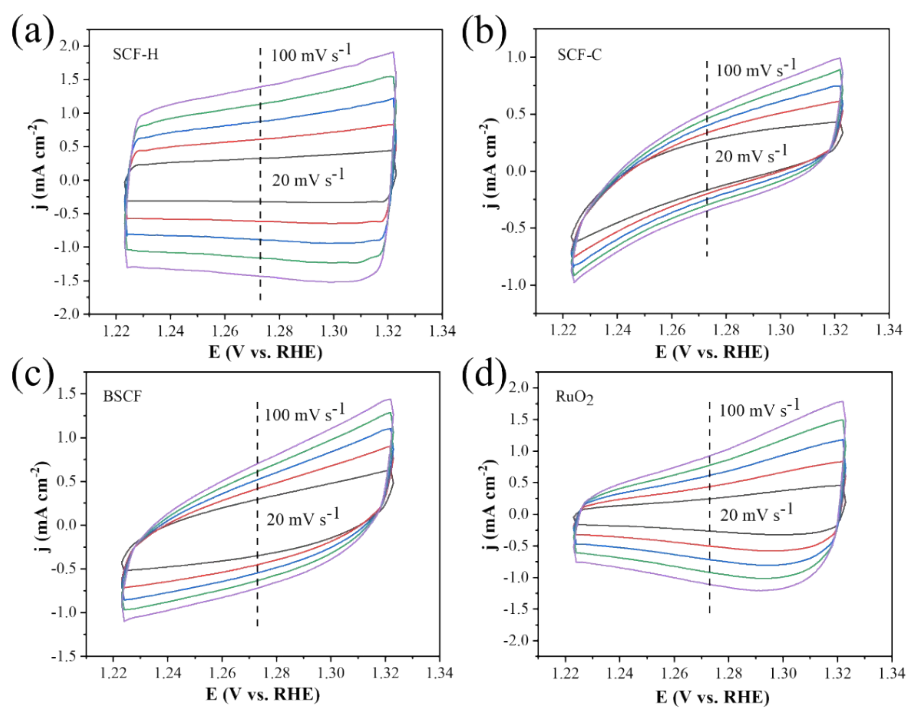

**Fig. S4.** CV curves of a) SCF-H, b) SCF-C, c) BSCF, d)  $\text{RuO}_2$ .

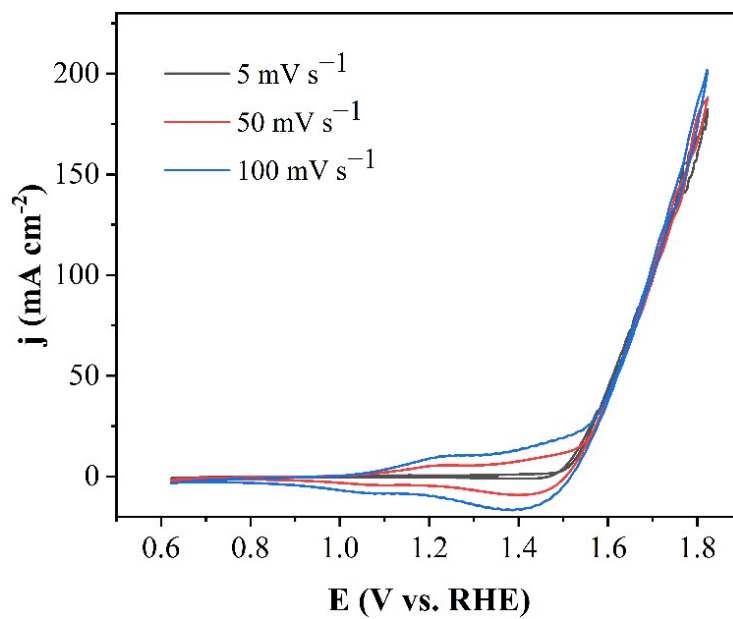

Fig. S5. CV curves of SCF-H at different scan rates.

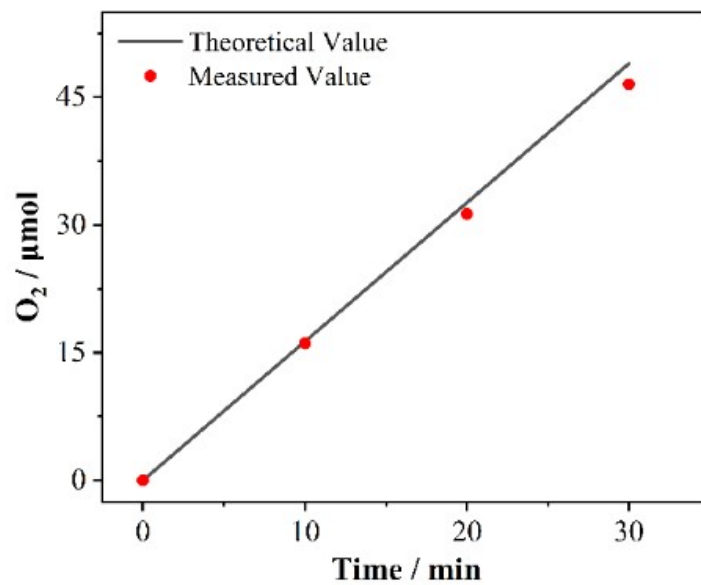

Fig. S6 Electrocatalytic efficiency of O<sub>2</sub> production over SCF-H.

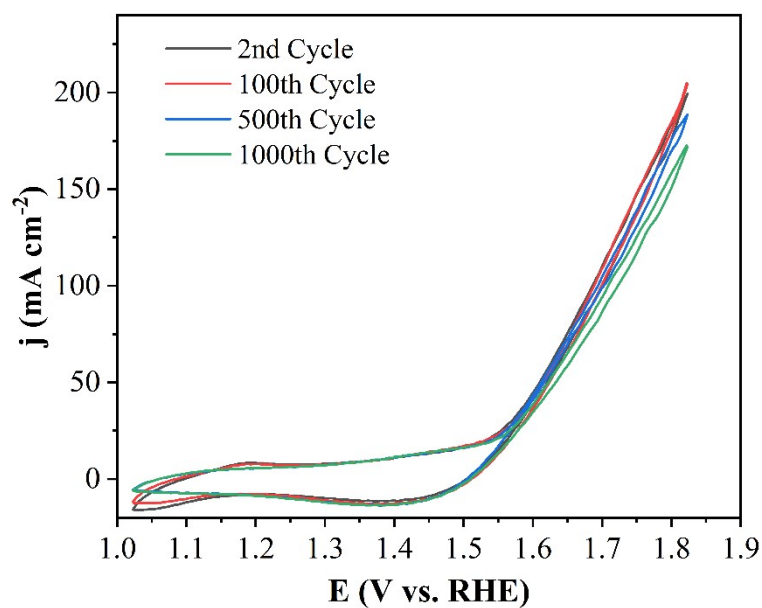

Fig. S7. Cyclic voltammograms of SCF-H.

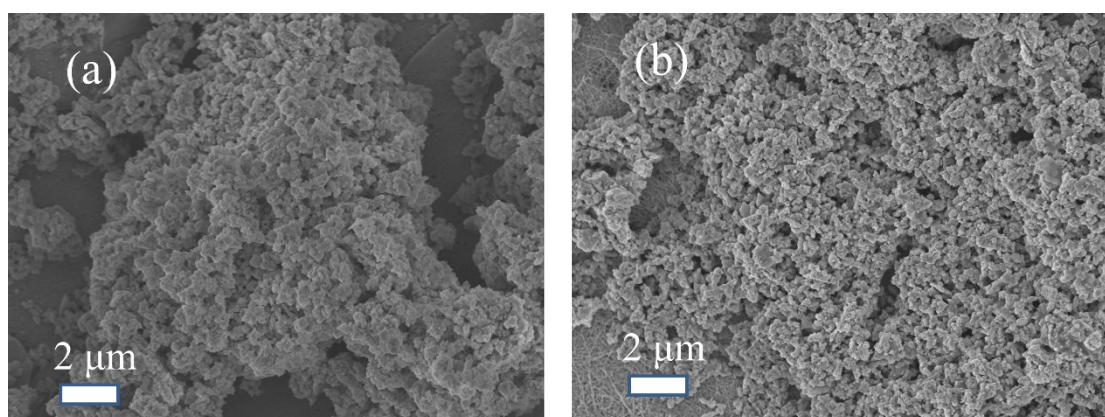

Fig. S8. a) SEM image of hexagonal SCF-H before OER. b) SEM image of hexagonal SCF-H after OER.

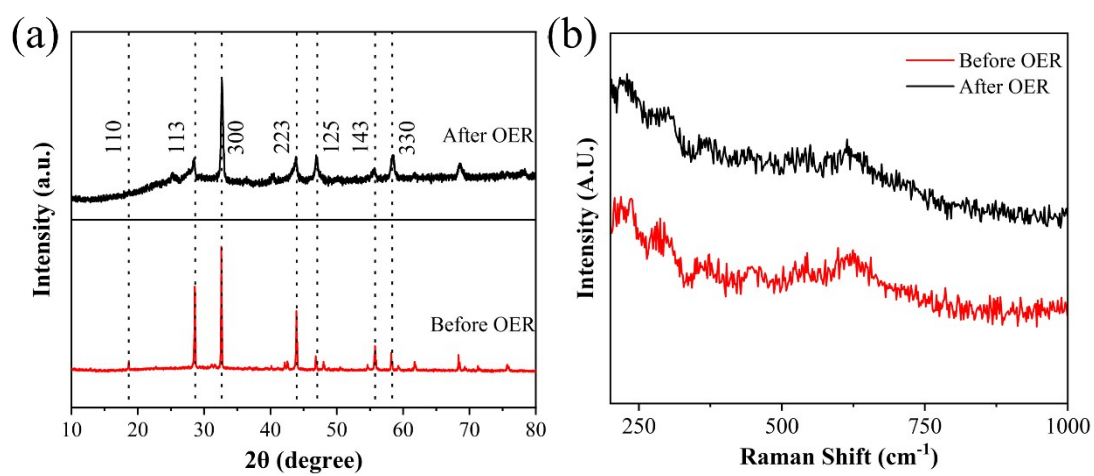

Fig. S9. a) XRD patterns of hexagonal SCF-H before and after OER. b) Raman spectra of hexagonal SCF-H before and after OER.

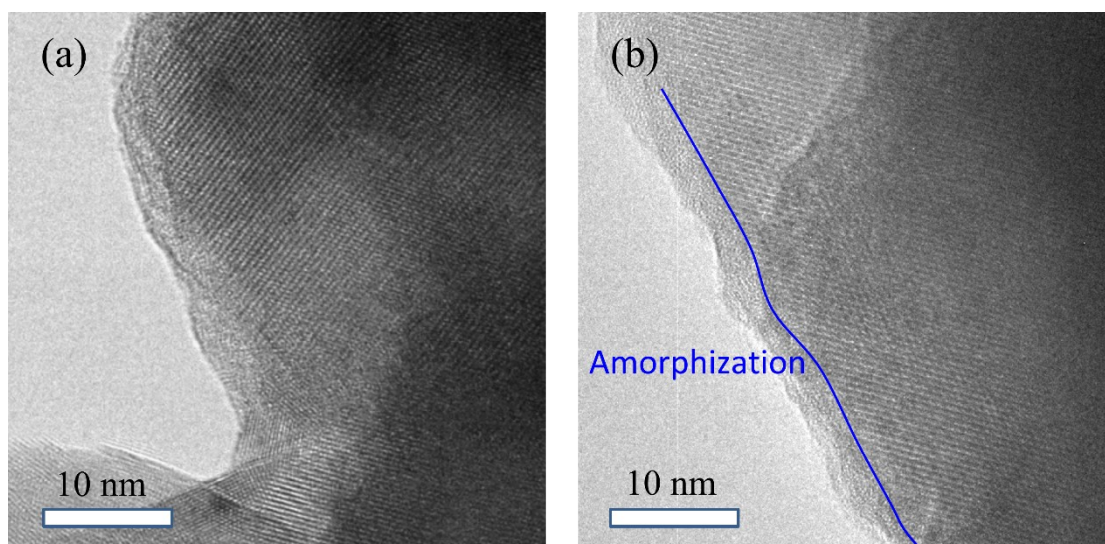

**Fig. S10.** a) HRTEM image of hexagonal SCF-H before OER. b) HRTEM image of hexagonal SCF-H after OER.

**Table S2.** The element concentration of Sr, Co and Fe in the 1 M KOH solution after cycling stability test.

| Sample              | Sr element concentration( $\mu\text{g/L}$ ) | Co element concentration( $\mu\text{g/L}$ ) | Fe element concentration( $\mu\text{g/L}$ ) |
|---------------------|---------------------------------------------|---------------------------------------------|---------------------------------------------|
| Reference (1 M KOH) | ND                                          | ND                                          | ND                                          |
| SCF-H (1 M KOH)     | 0.159                                       | 0.068                                       | ND                                          |

ND = not detected

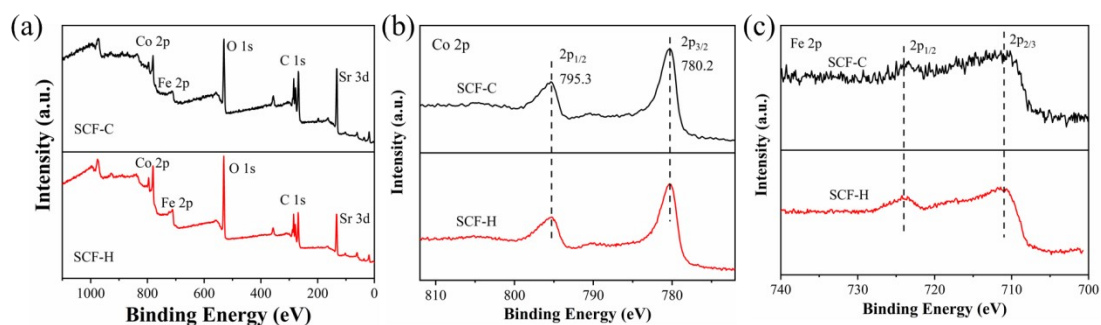

**Fig. S11.** XPS spectra of SCF-H and SCF-C: a) full spectrum, b) Co 2p, c) Fe 2p.

### Computational methods:

The density functional theory (DFT) calculations were carried out using the CASTEP code of Materials Studio package of AccelrysInc<sup>9</sup>. The DFT exchange correlation energy was calculated using the generalized gradient approximation (GGA) method and the Perdew-Burke-Ernzerhof (PBE) functional. The ultrasoft pseudo-potentials (USP) were used for treating the core electrons. The kinetic energy cutoff was set to 400 eV for the plane-wave basis set and the self-consistent field tolerance was  $1 \times 10^{-6}$  eV. The Brillouin zone was sampled by  $6 \times 6 \times 1$  Monkhorst-Pack mesh k-point for surface calculation and the density of states (DOS) calculation.

## REFERENCES

1. X. Miao, L. Wu, Y. Lin, X. Yuan, J. Zhao, W. Yan, S. Zhou and L. Shi, *ChemComm*, 2019, **55**, 1442-1445.
2. C. C. Wang, Y. Cheng, E. Ianni, S. P. Jiang and B. Lin, *Electrochim. Acta*, 2017, **246**, 997-1003.
3. N. Kumar, M. Kumar, T. C. Nagaiah, V. Siruguri, S. Rayaprol, A. K. Yadav, S. N. Jha, D. Bhattacharyya and A. K. Paul, *ACS Appl. Mater. Interfaces*, 2020, **12**, 9190-9200.
4. Y. Q. Zhang, H. B. Tao, Z. Chen, M. Li, Y. F. Sun, B. Hua and J. L. Luo, *J. Mater. Chem. A*, 2019, **7**, 26607-26617.
5. Q. A. Islam, R. Majee and S. Bhattacharyya, *J. Mater. Chem. A*, 2019, **7**, 19453-19464.
6. J. Wang, Y. Gao, D. J. Chen, J. P. Liu, Z. B. Zhang, Z. P. Shao and F. Ciucci, *ACS Catal.*, 2018, **8**, 364-371.
7. J. Cheng, P. Ganesan, Z. Wang, M. Zhang, G. Zhang, N. Maeda, J. Matsuda, M. Yamauchi, B. Chi and N. Nakashima, *Mater. Adv.*, 2021, **3**, 272-281.
8. L. L. Zhang, H. Zhu, J. Hao, C. Wang, Y. K. Wen, H. N. Li, S. L. Lu, F. Duan and M. L. Du, *Electrochim. Acta*, 2019, **327**, 135033.
9. S. J. Clark, M. D. Segall, C. J. Pickard, P. J. Hasnip, M. I. Probert, K. Refson and M. C. Payne, *Z Kristallogr Cryst Mater*, 2005, **220**, 567-570.
